# Supplementary material for: An Integrated Data Driven Approach to Drug Repositioning Using Gene-Disease Associations
Source: PLOS journal article supplement (doi:10.1371/journal.pone.0155811), 2016-05-19
Supplement: S11 (10.1371/journal.pone.0155811.s011) [file journal.pone.0155811.s011]

| Source  | # has_indication (% of total from source) |
|---------|-------------------------------------------|
| CTD     | 14,761 (79.6)                             |
| SIDER4  | 3,641 (81.1 )                             |
| PREDICT | 1,210 (95.7)                              |
| NDFRT   | 2,586 (58.8)                              |
